# Supplementary material for: Hyperglycaemia-induced reciprocal changes in miR-30c and PAI-1 expression in platelets
Source: PubMed Central journal article supplement (PMC5098184; doi:10.1038/srep36687), 2016-11-07

## Supplementary Information for

# Hyperglycaemia-induced reciprocal changes in miR-30c and PAI-1 expression in platelets

Mao Luo<sup>1,2</sup>, Rong Li<sup>1,2</sup>, Meiping Ren<sup>1,2</sup>, Ni Chen<sup>1,2</sup>, Xin Deng<sup>1,2</sup>, Xiaoyong Tan<sup>1,2</sup>, Yongjie Li<sup>1,2</sup>, Min Zeng<sup>1,2</sup>, Yan Yang<sup>4</sup>, Qin Wan<sup>3\*</sup>, Jianbo Wu<sup>1,2,4\*</sup>

<sup>1</sup> Drug Discovery Research Center, Southwest Medical University, Luzhou, Sichuan, China.

<sup>2</sup> Laboratory for Cardiovascular Pharmacology of department of Pharmacology, the School of Pharmacy, Southwest Medical University, Luzhou, Sichuan, China.

<sup>3</sup> Department of Endocrinology, the First Affiliated Hospital of Southwest Medical University, Luzhou, Sichuan, China.

<sup>4</sup> Dalton Cardiovascular Research Center, University of Missouri, Columbia, MO.

\*Correspondence: Jianbo Wu, Division of Cardiovascular Medicine, University of Missouri, 5 Hospital Drive, CE344–DC095.00, Columbia, Missouri 65212. Email: [wuji@missouri.edu](mailto:wuji@missouri.edu), Phone: +86-830-4040, Fax: (573) 884-7743. Or to: Qin Wan, Department of Endocrinology, The Affiliated Hospital of Southwest Medical University, Luzhou 646000, China. Email: [wangqin3@163.com](mailto:wangqin3@163.com).

## Supporting Information

**Supplementary Table S1. Baseline characteristics of the study population.** Data are shown as the mean  $\pm$  standard deviation. BMI, body mass index; TC, total cholesterol; TG, triglyceride; HDL-C, high-density lipoprotein cholesterol; LDL-C, low-density lipoprotein cholesterol; BP, blood pressure; WC, waist circumference; HbA1c, hemoglobin A1c.

**Supplementary Table S2. Sequences of primers used in the study.**

**Supplementary Figure S1. PAI-1 is a predicted miR-30c target with high complementarity and evolutionary conservation.** (A) Prediction of miR-30c targeting PAI-1 by bioinformatic analysis. Sequence conservation of the predicted miR-30c binding sites in the 3' UTR of PAI-1, with the miR-30c seed and seed matches highlighted in yellow. (B) The extent of evolutionary conservation of miR-30c in different species was analysed by MEME software.

**Supplementary Figure S2. Diabetic mice induces obesity, hyperglycemia, and increased plasma leptin in mice.** db/db mice metabolic changes, (A) body weight, (B) plasma glucose, (C) plasma leptin. (n=5/group); \*P<0.05 vs. db/db group. Mice were fed high-fat diet (HFD) or normal diet (NCD) for 14 weeks, after which (D) body weight, (E) plasma glucose, (F) plasma insulin, and (G and H) plasma leptin were measured (n=5/group); \*P<0.05 vs. NCD group, or lenti-NC injection HFD-*Pai-1*<sup>-/-</sup>→HFD-WT mice; \*\*p< 0.05 vs. lenti-NC injection HFD-WT→HFD-WT mice.

**Supplementary Table S1. Baseline characteristics of the study population.**

|                                 | <b>Healthy controls</b>     | <b>pre-DM</b>               | <b>NCDM</b>                  | <b>DM-CHD</b>                |
|---------------------------------|-----------------------------|-----------------------------|------------------------------|------------------------------|
| Number, n                       | 50                          | 50                          | 40                           | 34                           |
| Gender (male/female)            | 31/19                       | 23/27                       | 21/29                        | 15/19                        |
| Age, years                      | 52.2 ± 5.5                  | 53.6 ± 5.8                  | 58.6 ± 6.2                   | 61.3 ± 6.5                   |
| BMI, kg/m <sup>2</sup>          | 23.6 ± 2.8                  | 25.2 ± 3.2                  | 27.3 ± 4.2                   | 28.5 ± 4.8                   |
| TC, mmol/L                      | 5.0 ± 0.8                   | 4.7 ± 0.9                   | 6.1 ± 0.5                    | 6.6 ± 0.9                    |
| TG, mmol/L                      | 1.7 ± 0.4                   | 1.6 ± 0.4                   | 1.9 ± 0.6                    | 2.3 ± 0.9                    |
| HDL-C, mmol/L                   | 1.3 ± 0.1                   | 1.3 ± 0.2                   | 1.1 ± 0.1                    | 1.1 ± 0.2                    |
| LDL-C, mmol/L                   | 2.1 ± 0.5                   | 2.2 ± 0.6                   | 2.6 ± 0.8                    | 2.8 ± 0.5                    |
| Current smoker (%)              | 32.0                        | 36.0                        | 35.0                         | 44.1                         |
| BP (Systolic / diastolic), mmHg | 108.6 ± 11.2<br>/80.0 ± 4.0 | 115.5 ± 11.5<br>/80.5 ± 4.5 | 131.6 ± 20.2<br>/82.7 ± 8.66 | 139.2 ± 24.3<br>/84.0 ± 11.2 |
| WC, cm                          | 79.6 ± 10.2                 | 82.5 ± 9.6                  | 104.5 ± 11.6                 | 105.0 ± 13.2                 |
| Blood GLU (mmol/L) FPG          | 4.8 ± 0.4                   | 6.2 ± 0.8                   | 7.8 ± 0.8                    | 88.2 ± 1.1                   |
| 2h PG                           | 6.3 ± 0.8                   | 8.1 ± 1.2                   | 12.2 ± 1.4                   | 13.5 ± 1.5                   |
| HbA1c (%)                       | 5.3 ± 0.2                   | 5.8 ± 0.3                   | 7.3 ± 0.5                    | 7.5 ± 1.2                    |

**Supplemental Table S2. Sequences of primers used in the study.**

|                                | <b>Primer</b>                               | <b>Sequences</b>                                      |
|--------------------------------|---------------------------------------------|-------------------------------------------------------|
| LDP preparations measuring     | Sense primer of CD45                        | 5'- AACAGTGGAGAAAGGACACA-3'                           |
|                                | Antisense primer of CD45                    | 5'- TGTGTCCAGAAAGGCAAAGC-3'                           |
|                                | Sense primer of GPIIb                       | 5'- GAATCGCGATGTTGGTGAGC-3'                           |
|                                | Antisense primer of GPIIb                   | 5'- GGTCACACTGCACCACAGTA-3'                           |
| Stem-loop Q-RT-PCR for miR-30c | Stem-loop RT primer of miR-30c              | 5'-CTCAACTGGTGTCTGGAGTCGGCA<br>ATTCAGTTGAGGCTGAGA -3' |
|                                | Sense primer of miR-30c                     | 5'- ACACTCCAGCTGGGTGTAAACATCCTACACTC -3'              |
|                                | Antisense primer of miR-30c                 | 5'- CTCAACTGGTGTCTGGGA -3'                            |
|                                | Sense primer of reference gene U6           | 5'-CTCGCTTCGGCAGCACA-3'                               |
|                                | Antisense primer of reference gene U6       | 5'-AACGCTTCACGAATTTGCGT-3'                            |
| Real-time PCR for human PAI-1  | Sense primer of PAI-1                       | 5'- TTCAGGCTGACTTCACGAGT -3'                          |
|                                | Antisense primer of PAI-1                   | 5'- CCAGATGAAGGCGTCTTTCC -3'                          |
|                                | Sense primer of reference gene 18S rRNA     | 5'-CCTGGATACCGCAGCTAGGA-3'                            |
|                                | Antisense primer of reference gene 18S rRNA | 5'-GCGGCGCAATACGAATGCCCC-3'                           |
| Vector construction            | Sense primer of PAI-1 XhoI                  | 5'- CCGCTCGAGCCCTGGGGAAAGACGCCT -3'                   |
|                                | Antisense primer of PAI-1 NotI              | 5'- ATAAGAATGCGGCCGCTTGACTGTCCTGACA                   |

|                                   |                                          |                                                                                  |
|-----------------------------------|------------------------------------------|----------------------------------------------------------------------------------|
|                                   | Sense primer of mut-PAI-1                | TATTCTTCGTATTTA-3'<br>5'- ATTTTGGAGTGTAGGTGACTACAAATGTCATT<br>GAAGCAGATTTCTGC-3' |
|                                   | Antisense primer of mut-PAI-1            | 5'- GCAGAAATCTGCTTCAATGACATTTGTAGTCAC<br>CTACACTCCAAAAT-3'                       |
| Lenti-miR-30c Vector construction | mir-30c Bam HIF                          | 5'- CGCGGATCCACCATGTTGTAGTGTGTGTAAC<br>ATCCTACACTCTCAGCTGTGAGCTCAAGGTGG-3'       |
|                                   | mit-30c Eco RIR                          | 5'-CCGGAATTCTCCATGGCAGAAGGAGTAAACAA<br>CCCTCTCCAGCCACCTTGAGCTCACAGC-3'           |
| Real-time PCR for mice PAI-1      | Sense primer of PAI-1                    | 5'- GGACACCCTCAGCATGTTCA-3'                                                      |
|                                   | Antisense primer of PAI-1                | 5'- TCTGATGAGTTCAGCATCCAAGAT-3'                                                  |
|                                   | Sense primer of reference gene GAPDH     | 5'-TGCCCAGAACATCATCCCTG-3'                                                       |
|                                   | Antisense primer of reference gene GAPDH | 5'-TGAAGTCGCAGGAGACAACC-3'                                                       |

Supplementary Figure S1.

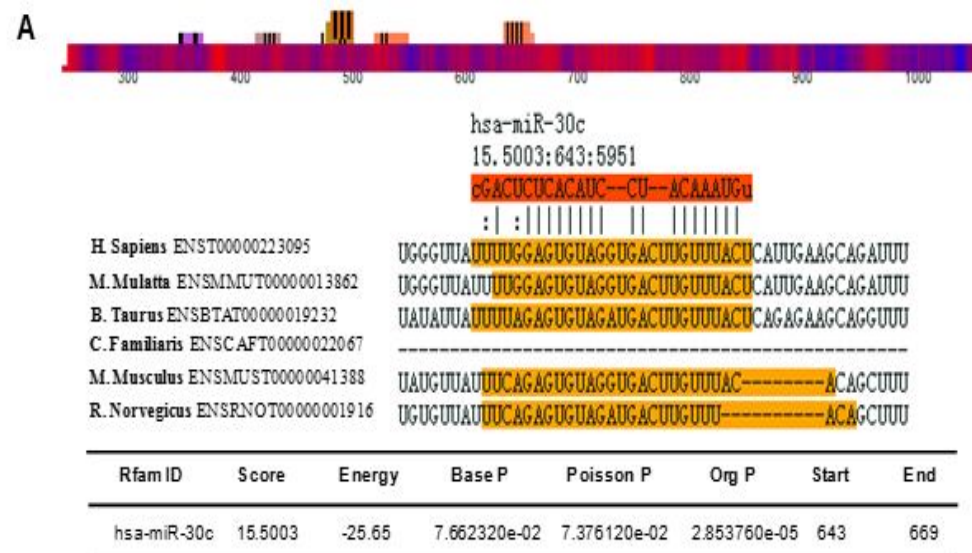

**B**

| Name          | Sites                          |
|---------------|--------------------------------|
| H. Sapiens    | UUUUGGAGUGUAGGUGACUUGUUUACU    |
| M. Mulatta    | UUUUGGAGUGUAGGUGACUUGUUUACU    |
| B. Taurus     | UUUUGAGAGUGUAGAGUAGC UUGUUUACU |
| C. Familiaris | -----                          |
| M. Musculus   | UUUCAGAGUGUAGGUGACUUGUUUAC-    |
| R. Norvegicus | UUUCAGAGUGUAGAGUAGC UUGUUU---  |

Supplementary Figure S2.

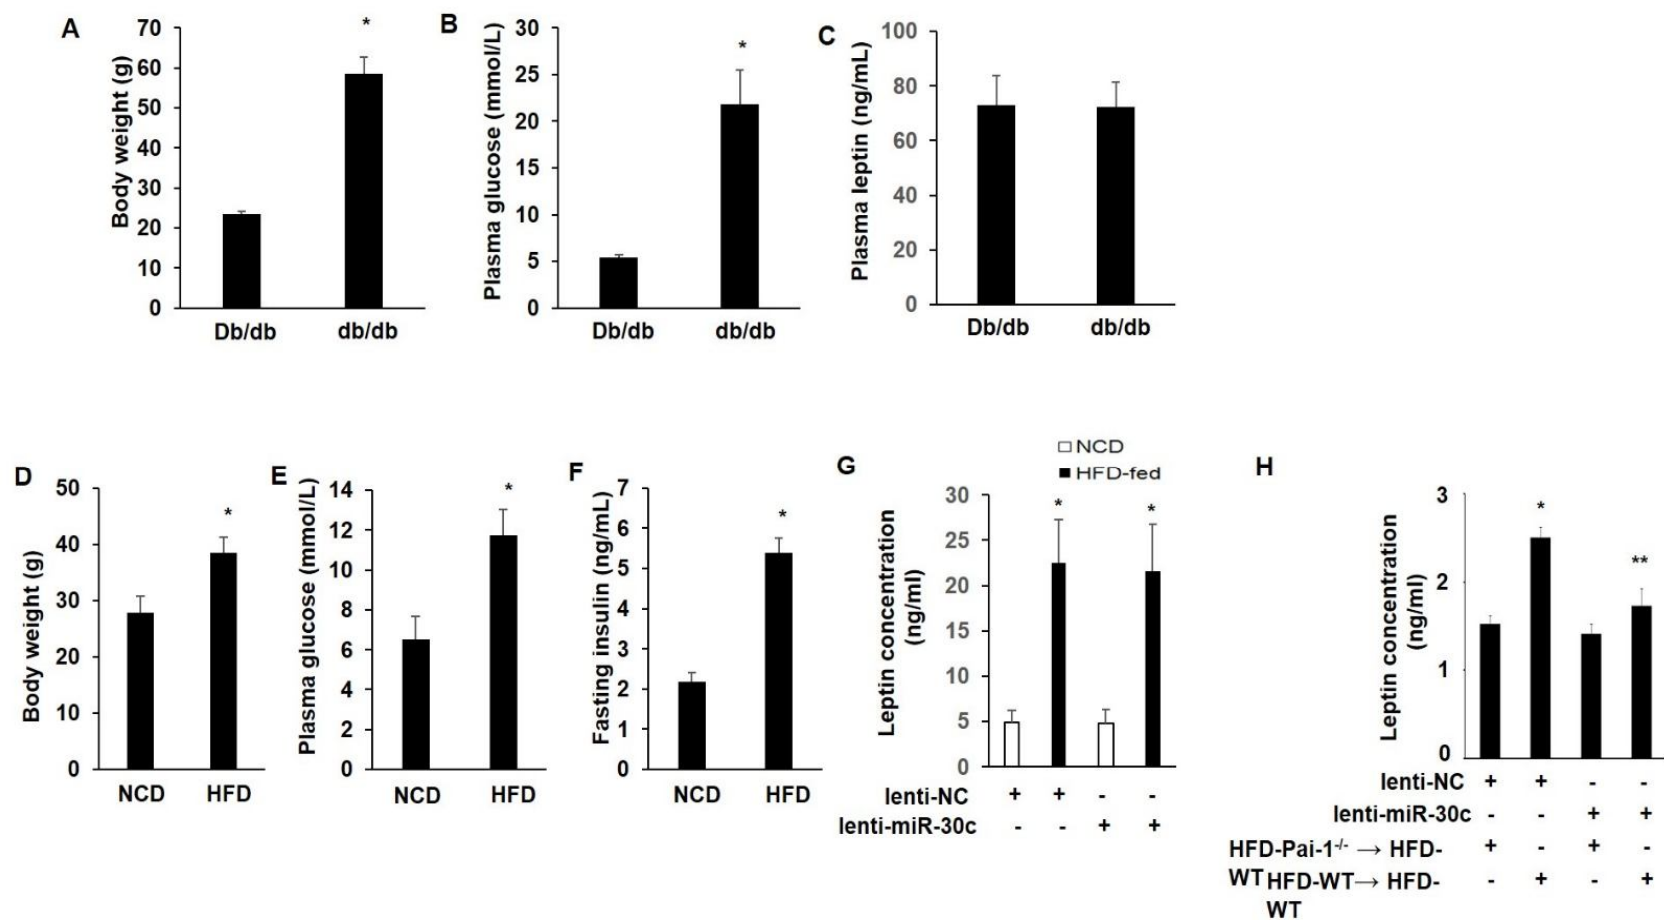

Supplement: srep36687-s1.pdf [file srep36687-s1.pdf]
